# Supplementary material for: Strategic Sexual Signals: Women's Display versus Avoidance of the Color Red Depends on the Attractiveness of an Anticipated Interaction Partner
Source: PubMed Central journal article supplement (PMC4784733; doi:10.1371/journal.pone.0148501), 2016-03-09
Supplement: pone.0148501.s001.pdf [file pone.0148501.s001.pdf]

Figure 1. Displaying red as a function of experimenter's attractiveness

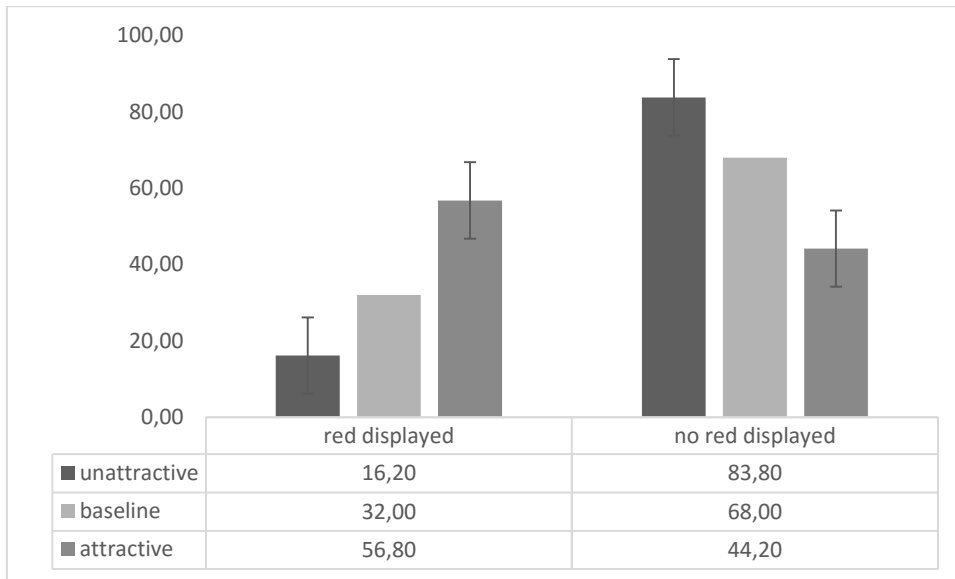

Note. Confidence interval based on a 1%-level of significance
