# Supplementary material for: Strategic Sexual Signals: Women's Display versus Avoidance of the Color Red Depends on the Attractiveness of an Anticipated Interaction Partner
Source: PubMed Central journal article supplement (PMC4784733; doi:10.1371/journal.pone.0148501), 2016-03-09
Supplement: pone.0148501.s002.pdf [file pone.0148501.s002.pdf]

**Table 1. Red display of women in the unattractive and attractive experimenter condition**

| <b>Stimulus attractiveness</b> | <b>Red not displayed</b> | <b>Red displayed</b> | <b>Total</b> |
|--------------------------------|--------------------------|----------------------|--------------|
| Attractive                     | 16                       | 21*                  | 37           |
|                                | 34%                      | 77.80%               | 50%          |
| Unattractive                   | 31                       | 6*                   | 37           |
|                                | 66%                      | 22.20%               | 50%          |
| Total                          | 47                       | 27                   |              |
|                                | 100%                     | 100%                 |              |

Note. Between columns percentages differ at a .05 level.
